# Supplementary material
Source: Springer Nature journal article supplement (https://www.springermedizin.de/resource/supplementary/12957_2011_974_MOESM1_ESM.pdf/9561800)

Anonymous, Male 1933

wise01:4265

Kontrast: KM i.v. 400

Gantry: 0°

FoV: 351.562 mm

Zeit: 500 ms

Schicht: 7 mm

Pos: 224

FFS

F: FC51

120 mA

120 kV

Bild-Nr.: 13

Bild 33 von 45

06.12.2005, 12:18:36

ZZ:-5000, BB: 1500.0 Anonymous, Male 1933

Wise01:4265

Kontrast: KM i.v. 400

Gantry: 0°

FoV: 367.187 mm

Zeit: 500 ms

Schicht: 5 mm

Pos: 220

FFS

F: FC51

127 mA

120 kV

Bild-Nr.: 45

Bild 45 von 62

A429.03.2010, 13:08:11

Z: -500.0, B: 1500.0

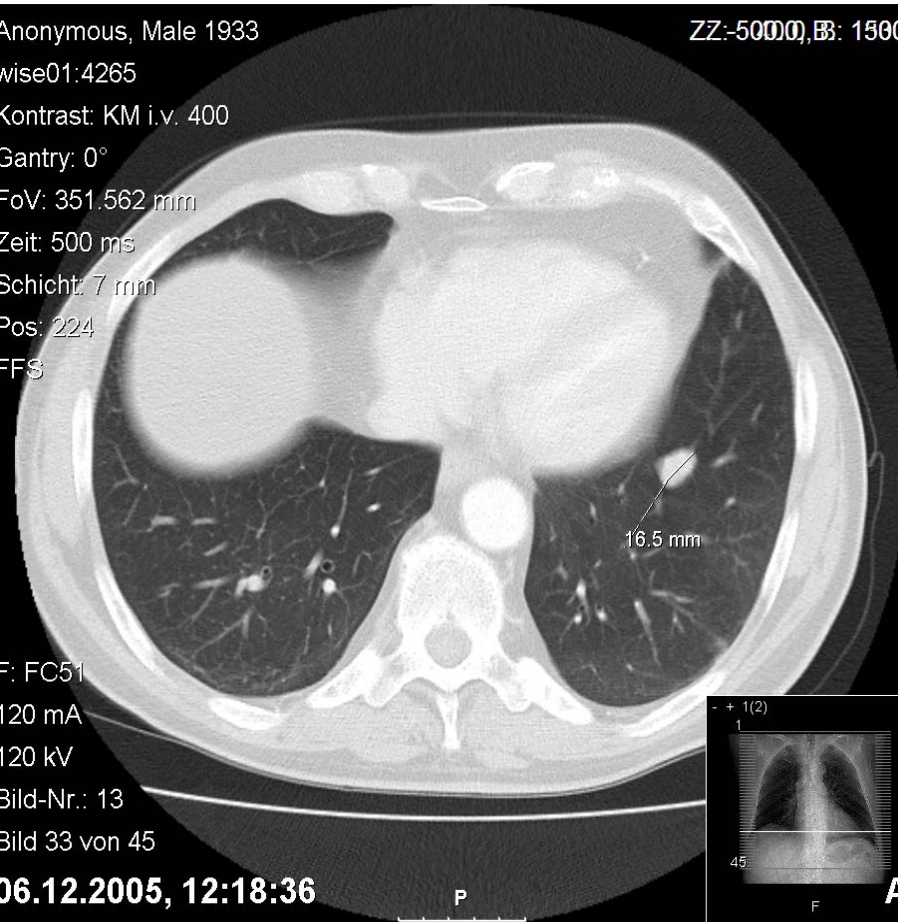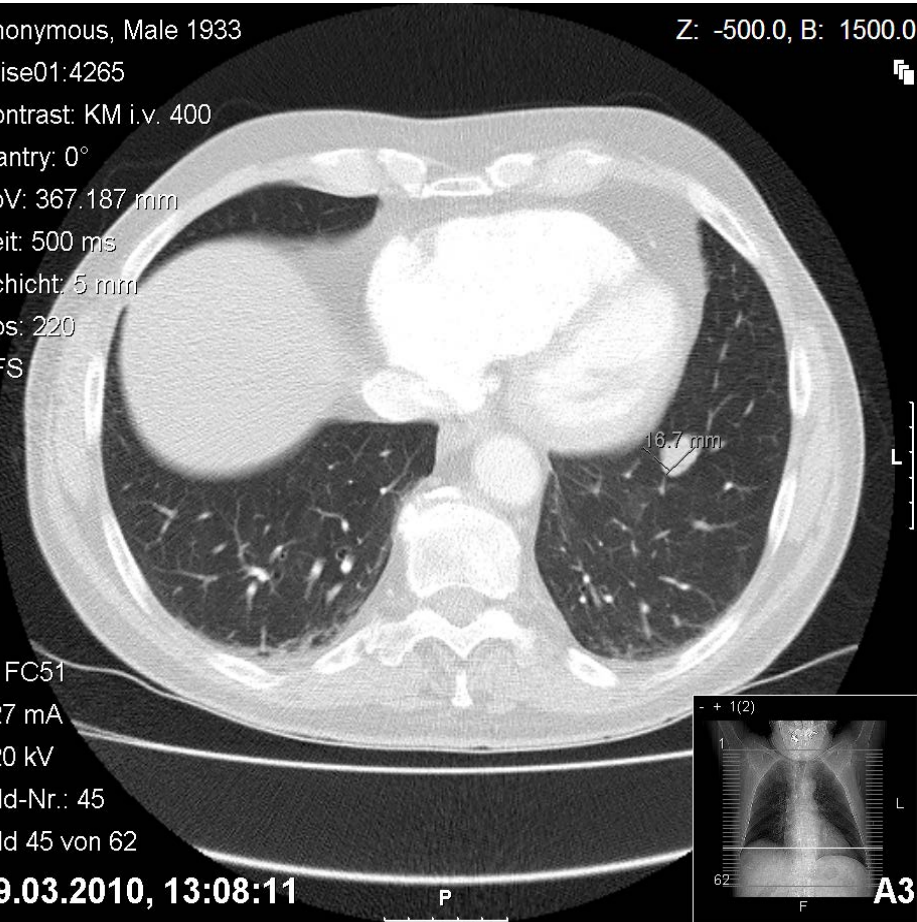

Supplement: MOESM1 [file 9561800]
